# Supplementary material for: Naturally Occurring Mutations in HIV-1 CRF01_AE Capsid Affect Viral Sensitivity to Restriction Factors
Source: PubMed Central journal article supplement (PMC5899301; doi:10.1089/aid.2017.0212), 2018-04-01
Supplement: Supp_Table2.pdf [file Supp_Table2.pdf]

SUPPLEMENTAL TABLE S2. LIST OF REFERENCE FOR CHINESE SEQUENCES

| <i>Accession No.</i>                                        | <i>Title</i>                                                                                                                                      | <i>Journal</i>                                     |
|-------------------------------------------------------------|---------------------------------------------------------------------------------------------------------------------------------------------------|----------------------------------------------------|
| JX112847, 49, 54, 55, 59<br>JX112796, 98, 99<br>JX112800-08 | The rapidly expanding CRF01_AE epidemic in China is driven by multiple lineages of HIV-1 viruses introduced in the 1990s                          | AIDS 27 (11), 1793–1802 (2013)                     |
| KM217833–KM217835<br>KM217837–KM217855                      | Comprehensive characterization of the transmitted/founder <i>env</i> genes from a single MSM cohort in China                                      | J Acquir Immune Defic Syndr 69 (4), 403–412 (2015) |
| JX960603–JX960626<br>JX960628–JX960634                      | Reconstituting the epidemic history of CRF01_AE among MSM in Liaoning, northeastern China: implication in expanding MSM epidemic in China         | J Virol 86 (22), 12402–12406 (2012)                |
| KC183777                                                    | New emerging recombinant HIV-1 strains and close transmission linkage of HIV-1 strains in the Chinese MSM population indicate a new epidemic risk | PLoS One 8 (1), E54322 (2013)                      |
| KJ778895<br>KJ778896                                        | Near full-length genomic characterization of a novel HIV type 1 CRF01_AE/07_BC recombinant in men who have sex with men from Shannxi, China       | Unpublished                                        |
